# Supplementary material for: Enhanced residual risk of abamectin induced by 6PPD: in water, soil, and vegetables
Source: Royal Society of Chemistry journal article supplement (doi:10.1039/d5em00053j), 2025-01-01
Supplement: d5em00053j1.pdf [file d5em00053j1.pdf]

18 Number of pages: 15; number of Tables: 10; Texts: 2; number of Figures: 8.

19 Text S1: The corresponding locations of water samples are as follows: water-A  
20 (Tongzhou, Beijing, Chaobai River north section), water-B (Tongzhou, Beijing,  
21 Chaobai River south section), water-C (Changping, Beijing, lake in ming tombs),  
22 water-D (Wuhu, Anhui, Xingang Town field pond), water-E (Wuhu, Anhui, Xingang  
23 Town roadside pond), water-F (Maanshan, Anhui, Huanfeng Town roadside pond)  
24 and water-G (Yibin, Sichuan, Yangtze River). The corresponding locations of soil  
25 samples are as follows: soil-A (Tongzhou, Beijing, Chaobai riverside north section),  
26 soil-B (Tongzhou, Beijing, Chaobai riverside south section), soil-C (Changping,  
27 Beijing, ming tombs), soil-D (Wuhu, Anhui, Xingang Town field), soil-E (Wuhu,  
28 Anhui, Xingang Town roadside), soil-F (Maanshan, Anhui, Huanfeng Town roadside),  
29 soil-G (Yibin, Sichuan, Yangtze riverside), soil-H (Nanning, Guangxi University  
30 farm-1), soil-I (Nanning, Guangxi, Guangxi University farm-2), soil-J (Hefei, Anhui,  
31 Guanting Town field), soil-K (Changsha, Hunan, Huanghua Town field), soil-L (Yuxi,  
32 Yunnan, Xiushan Town field), soil-M (Haidian, Beijing, China Agricultural  
33 University gate roadside) and soil-N (Haidian, Beijing, China Agricultural University).

34 Text S2: Detailed steps of QuEChERS methods for abamectin analysis:

35 1.1 Abamectin in water: The samples from the degradation experiment of abamectin  
36 in water were directly subjected to HPLC-MS/MS detection after filtered through a  
37 0.22  $\mu\text{m}$  filter membrane.

38 1.2 Abamectin in soil: The soil is sandy red soil from Fujian, which was sieved  
39 through a 2mm mesh before use. 5g of soil was weighed into a 50 mL centrifuge tube

40 along with 5.0 g of NaCl, 5.0 mL of deionized water, and 5.0 mL of acetonitrile. The  
41 mixture was shaken for 5 min and then centrifuged at 3800 rpm for 5 min.  
42 Subsequently, 1 mL of acetonitrile was extracted and filtered through a 0.22 µm filter  
43 membrane before being transferred into an autosampler vial for HPLC-MS/MS  
44 analysis.

45 1.3 Abamectin in pak choi: 5.0 g of crushed pak choi was weighed into a 50 mL  
46 centrifuge tube, combined with 2.0 g of NaCl, 5.0 mL of deionized water, and 5.0 mL  
47 of acetonitrile. The mixture was shaken for 5 min and then centrifuged at 3800 rpm  
48 for 5 min. Subsequently, 1 mL of acetonitrile was extracted into an Eppendorf tube  
49 containing 50 mg of C18 and 100 mg of MgSO<sub>4</sub>. The mixture was shaken for 1 min  
50 and then centrifuged at 10000 rpm for 1 min. Afterward, the sample was filtered  
51 through a 0.22 µm filter membrane before being transferred into an autosampler vial  
52 for HPLC-MS/MS analysis.

53 1.4 Abamectin in cabbage: 5.0 g of crushed cabbage was weighed into a 50 mL  
54 centrifuge tube, combined with 2.0 g of NaCl, 5.0 mL of deionized water, and 5.0 mL  
55 of acetonitrile. The mixture was shaken for 5 min and then centrifuged at 3800 rpm  
56 for 5 min. Subsequently, 1 mL of acetonitrile was extracted into an Eppendorf tube  
57 containing 30 mg of C18 and 100 mg of MgSO<sub>4</sub>. The mixture was shaken for 1 min  
58 and then centrifuged at 10000 rpm for 1 min. Afterward, the sample was filtered  
59 through a 0.22 µm filter membrane before being transferred into an autosampler vial  
60 for HPLC-MS/MS analysis.

61 1.5 Abamectin in cabbage leaf: A circular slice cut from the cabbage was placed into

a 15 mL centrifuge tube, combined with 2.0 g of NaCl, 5.0 mL of deionized water, and 5.0 mL of acetonitrile. The mixture was shaken for 10 min and then centrifuged at 3800 rpm for 5 min. Then, 1 mL of acetonitrile was subjected to HPLC-MS/MS detection after filtered through a 0.22  $\mu$ m filter membrane.

66

Table S1 Pretreatment methods for abamectin in various samples

| Matrix       | Extraction                                                                    | Purification                         |
|--------------|-------------------------------------------------------------------------------|--------------------------------------|
| Water        | Subjected to HPLC-MS/MS detection after filtered                              |                                      |
| Soil         | 5.0 g soil + 5.0 g NaCl + 5.0 mL H <sub>2</sub> O + 5.0 mL acetonitrile       | -                                    |
| Pak choi     | 5.0 g pak choi + 2.0 g NaCl + 5.0 mL H <sub>2</sub> O + 5.0 mL acetonitrile   | 50 mg C18 + 100 mg MgSO <sub>4</sub> |
| Cabbage      | 5.0 g cabbage + 2.0 g NaCl + 5.0 mL H <sub>2</sub> O + 5.0 mL acetonitrile    | 30 mg C18 + 100 mg MgSO <sub>4</sub> |
| Cabbage leaf | A circular slice + 2.0 g NaCl + 5.0 mL H <sub>2</sub> O + 5.0 mL acetonitrile | -                                    |

68

Table S2 The operating conditions of HPLC-MS/MS for abamectin and other macrolides

| Analyte           | Abamectin, Emamectin benzoate     | Moxidectin, Ivermectin, Eprinomectin, Doramectin, Selamectin |
|-------------------|-----------------------------------|--------------------------------------------------------------|
| Mobile phase      | Acetonitrile: 0.1% formic acid    | Acetonitrile: 0.1% formic acid                               |
| Flow rate         | 0.35 mL/min                       | 0.50 mL/min                                                  |
| Injection volume  | 10 $\mu$ L                        | 10 $\mu$ L                                                   |
| Column            | 25°C                              | 25°C                                                         |
| Scanning          | Multiple response monitoring      | Multiple response monitoring                                 |
| Ionization        | Electrospray ionization (ESI) (+) | Electrospray ionization (ESI) (+)                            |
| Ion source        | 300 °C                            | 300 °C                                                       |
| DL temperature    | 250 °C                            | 250 °C                                                       |
| Heating block     | 400 °C                            | 400 °C                                                       |
| Atomizing gas     | 3 L/min                           | 3 L/min                                                      |
| Heating gas flow  | 10 L/min                          | 10 L/min                                                     |
| Dry gas flow rate | 10 L/min                          | 10 L/min                                                     |

71

72

Table S3 The MRM parameters of abamectin and other macrolides

| Analyte            | Precursor ion ( <i>m/z</i> ) | Product ion ( <i>m/z</i> ) | Dwell Time (msec) | Q1 Pre Bias(V) | CE  | Q3 Pre Bias(V) |
|--------------------|------------------------------|----------------------------|-------------------|----------------|-----|----------------|
| Abamectin          | 895.60                       | 449.40                     | 100               | -32            | -64 | -32            |
|                    |                              | 751.40*                    | 100               | -32            | -64 | -22            |
| Moxidectin         | 640.83                       | 623.15*                    | 100               | -40            | -15 | -22            |
|                    |                              | 529.15                     | 100               | -40            | -12 | -38            |
| Ivermectin         | 897.50                       | 240.00*                    | 100               | -34            | -55 | -25            |
|                    |                              | 449.40                     | 100               | -34            | -55 | -10            |
| Eprinomectin       | 936.60                       | 352.00                     | 100               | -26            | -60 | -13            |
|                    |                              | 490.00*                    | 100               | -26            | -55 | -15            |
| Doramectin         | 921.55                       | 353.2                      | 100               | -34            | -58 | -23            |
|                    |                              | 449*                       | 100               | -34            | -53 | -30            |
| Selamectin         | 770.96                       | 627.20*                    | 100               | -20            | -17 | -22            |
|                    |                              | 609.20                     | 100               | -20            | -19 | -30            |
| Emamectin benzoate | 886.60                       | 158.10*                    | 100               | -34            | -55 | -25            |
|                    |                              | 126.30                     | 100               | -34            | -55 | -10            |

73

Table S4 The recovery and RSD of the proposed methods for the analyzing abamectin in soil and on leaf at three fortification levels

| Analytes          | 0.04 mg/kg |      | 0.4 mg/kg |      | 4 mg/kg  |      |
|-------------------|------------|------|-----------|------|----------|------|
|                   | Recovery   | RSD  | Recovery  | RSD  | Recovery | RSD  |
|                   | (%)        | (%)  | (%)       | (%)  | (%)      | (%)  |
| Abamectin in soil | 108.16     | 3.40 | 100.33    | 3.20 | 90.32    | 2.60 |
| Abamectin on leaf | 105.36     | 2.79 | 94.58     | 3.17 | 96.53    | 5.92 |

76

Table S5 The recovery and RSD of the proposed methods for the analyzing abamectin in pak choi and cabbage at three fortification levels

| Analytes | 0.05 mg/Kg | 0.5 mg/Kg | 5 mg/Kg |
|----------|------------|-----------|---------|
|----------|------------|-----------|---------|

|                       | Recovery | RSD  | Recovery | RSD  | Recovery | RSD  |
|-----------------------|----------|------|----------|------|----------|------|
|                       | (%)      | (%)  | (%)      | (%)  | (%)      | (%)  |
| Abamectin in pak choi | 102.44   | 3.50 | 100.27   | 4.40 | 85.68    | 1.70 |
| Abamectin in cabbage  | 111.73   | 7.57 | 104.10   | 5.93 | 99.26    | 9.24 |

79

80

81 Table S6 The operating conditions of HPLC-MS/MS for 6PPD

| 6PPD               |                                    |
|--------------------|------------------------------------|
| Mobile phase       | MeOH: Deionized water/90: 10       |
| Flow rate          | 0.3 mL/min                         |
| Column temperature | 25°C                               |
| Injection volume   | 5 µL                               |
| Scanning           | Multiple response monitoring (MRM) |
| Ionization         | Electrospray ionization (ESI) (+)  |
| Nebulizer          | 35 PSI                             |
| Gas flow           | 10.0 L/min                         |
| Gas temperature    | 350 °C                             |

82

83 Table S7 The MRM parameters of 6PPD

| Analyte | Precursor ion ( <i>m/z</i> ) | Product ion ( <i>m/z</i> ) | Cell energy (CE) (eV) | Fragmentor (V) |
|---------|------------------------------|----------------------------|-----------------------|----------------|
| 6PPD    | 269.3                        | 184.1*                     | 20                    | 110            |
|         |                              | 211.0                      | 20                    | 110            |

84

85 Table S8 Pretreatment methods for abamectin in various samples

| Matrix | Extraction                                                              | Purification             |
|--------|-------------------------------------------------------------------------|--------------------------|
| Water  | 5.0 mL water + 2.0 g NaCl + 5.0 mL acetonitrile                         | 100 mg MgSO <sub>4</sub> |
| Soil   | 5.0 g soil + 2.0 g NaCl + 5.0 mL H <sub>2</sub> O + 5.0 mL acetonitrile | 100 mg MgSO <sub>4</sub> |

86

87 Table S9 The recovery and RSD of the proposed methods for the analyzing 6PPD in  
88 water and soil at three fortification levels

| Analytes      | 0.05 mg/kg |      | 0.5 mg/kg |      | 5 mg/kg  |      |
|---------------|------------|------|-----------|------|----------|------|
|               | Recovery   | RSD  | Recovery  | RSD  | Recovery | RSD  |
|               | (%)        | (%)  | (%)       | (%)  | (%)      | (%)  |
| 6PPD in water | 88.95      | 6.54 | 95.32     | 5.22 | 98.27    | 4.24 |
| 6PPD in soil  | 100.32     | 5.13 | 82.26     | 8.36 | 79.04    | 8.98 |

89

90 Table S10 The structure of 6PPD and macrolides

| Analyte    | Structure                                                                                                                                                                                                        |
|------------|------------------------------------------------------------------------------------------------------------------------------------------------------------------------------------------------------------------|
| Abamectin  | 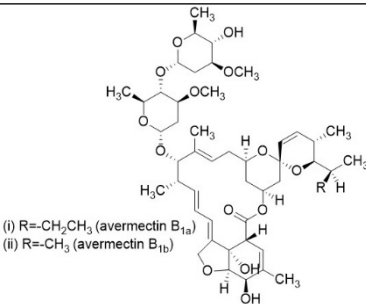 <p>(i) R=CH<sub>2</sub>CH<sub>3</sub> (abamectin B<sub>1a</sub>)<br/>(ii) R=CH<sub>3</sub> (abamectin B<sub>1b</sub>)</p>    |
| 6PPD       | 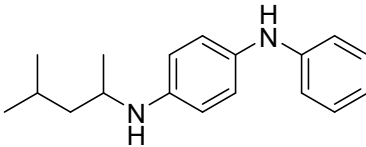                                                                                                                             |
| Moxidectin | 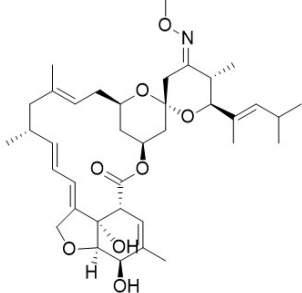 <p>(i) R=CH<sub>2</sub>CH<sub>3</sub> (moxidectin B<sub>1a</sub>)<br/>(ii) R=CH<sub>3</sub> (moxidectin B<sub>1b</sub>)</p> |
| Ivermectin | 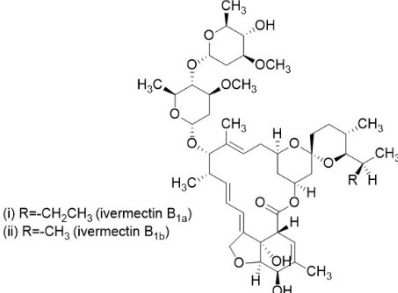 <p>(i) R=CH<sub>2</sub>CH<sub>3</sub> (ivermectin B<sub>1a</sub>)<br/>(ii) R=CH<sub>3</sub> (ivermectin B<sub>1b</sub>)</p> |

Eprinomectin

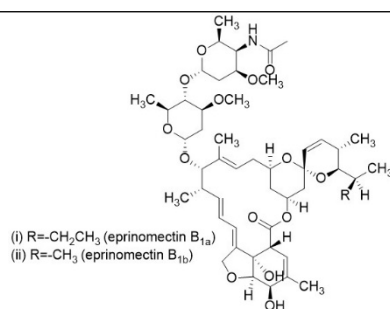

Doramectin

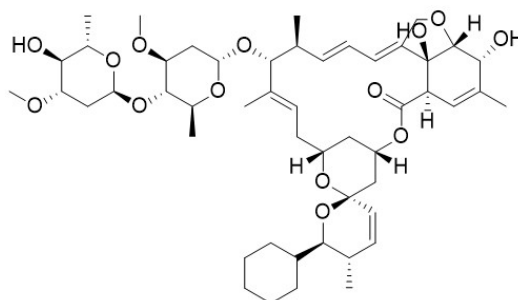

Selamectin

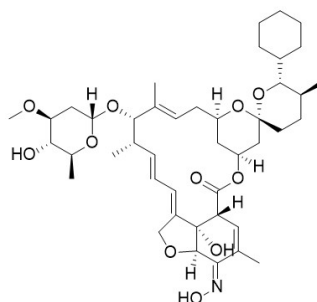

Emamectin  
benzoate

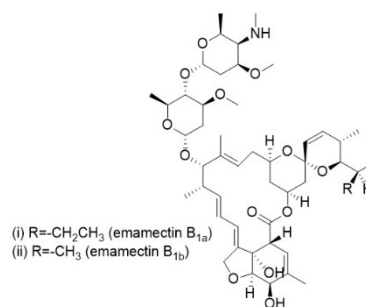

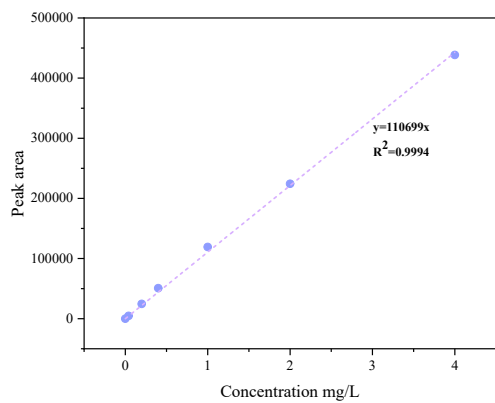

a

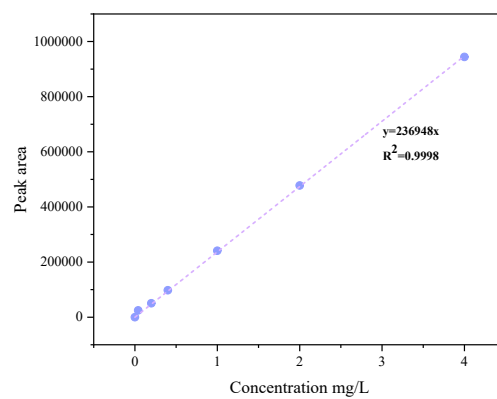

b

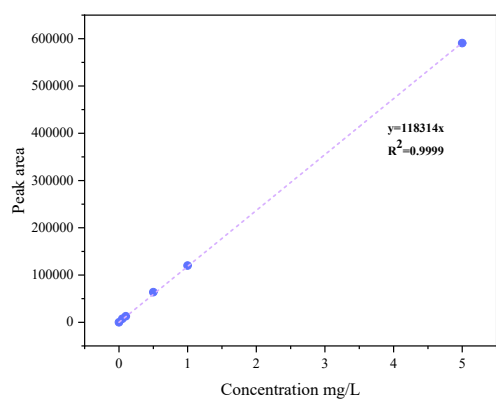

c

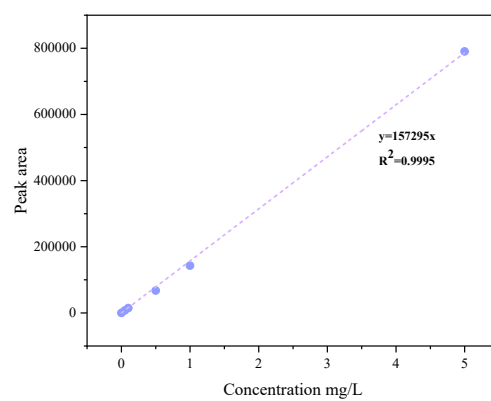

d

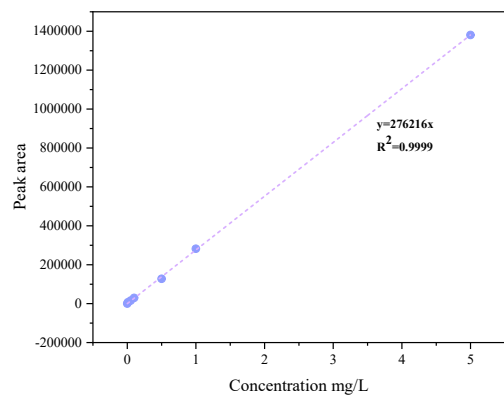

e

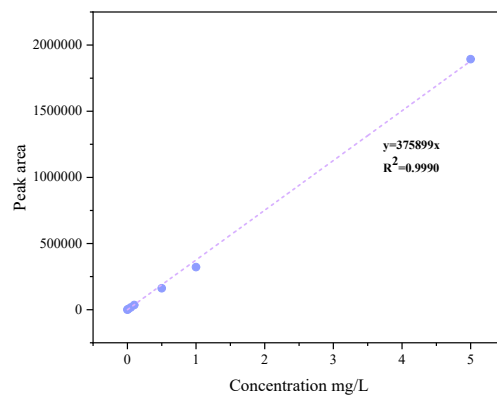

f

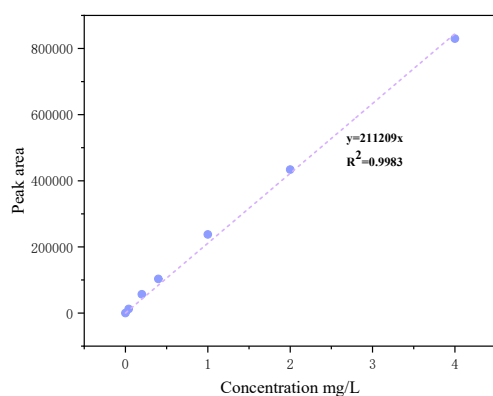

g

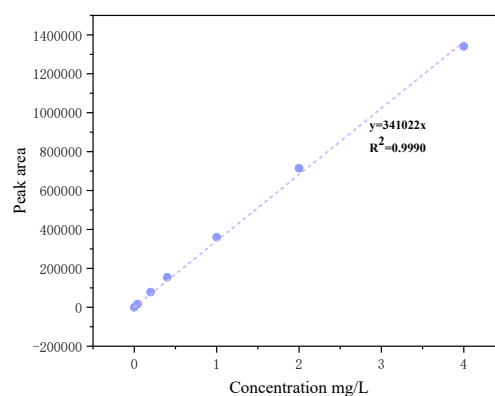

h

Figure S1 The calibration curves of abamectin in soil (a) and solvent (b), in pak choi (c) and solvent (d), in cabbage (e) and solvent (f), on cabbage leaf (g) and solvent (h).

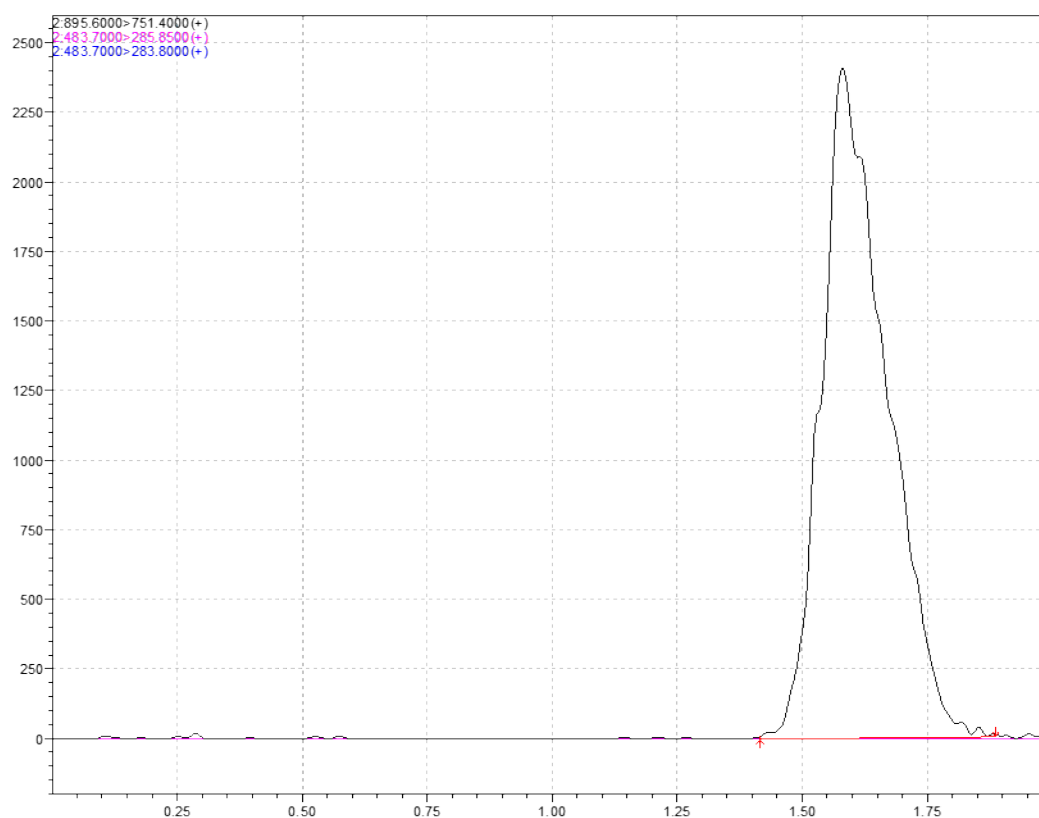

Figure S2 The chromatogram of abamectin in acetonitrile at a concentration of 0.05 mg/L

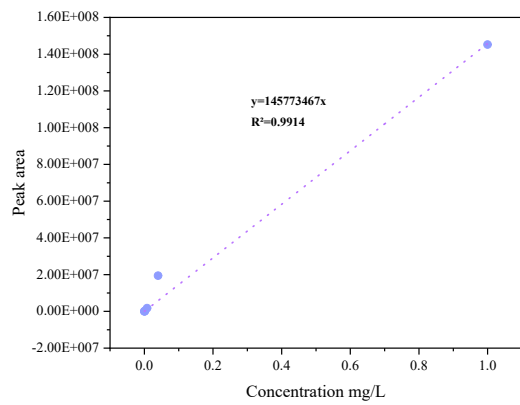

a

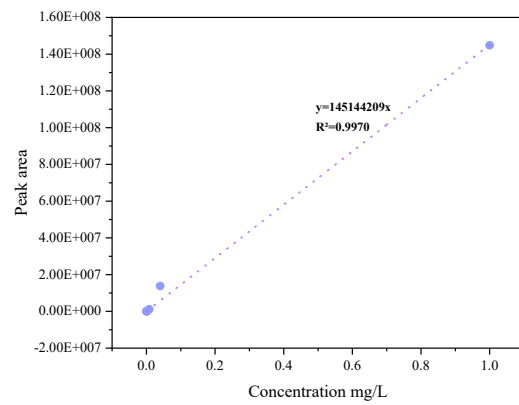

b

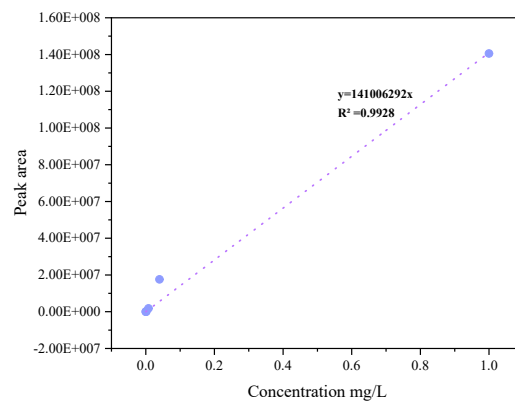

c

100

Figure S3 The calibration curves of 6PPD in water (a), soil (b) and solvent (c).

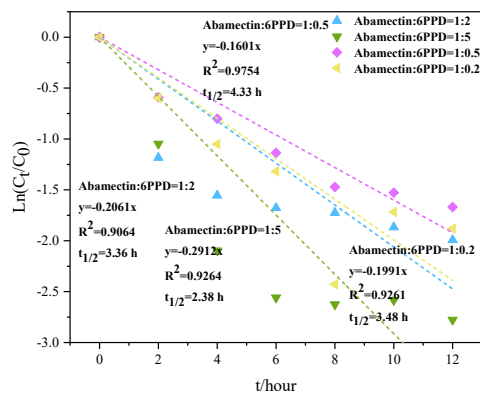

a

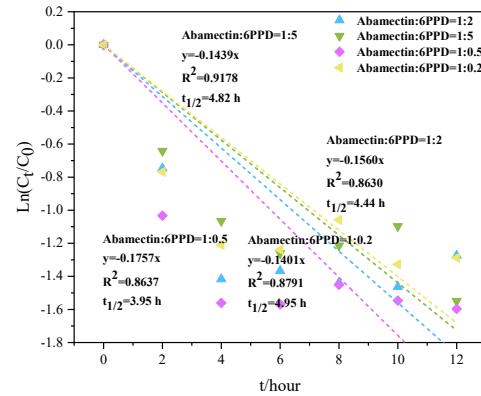

b

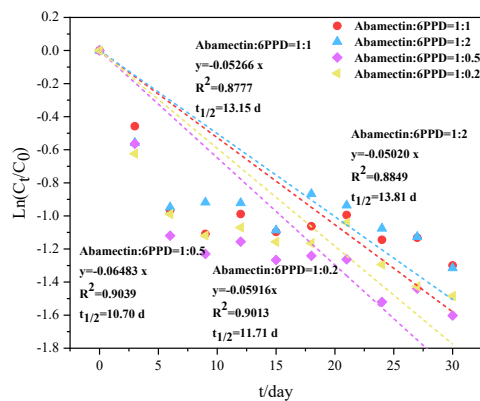

c

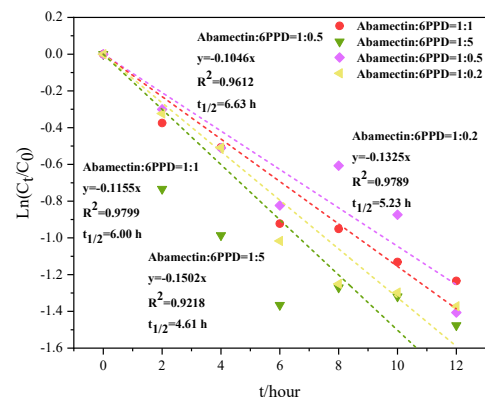

d

Figure S4 The other treatment groups on prolongation of abamectin half-life in water (a), soil (b), soil under darkness (c), and on cabbage leaf (d).

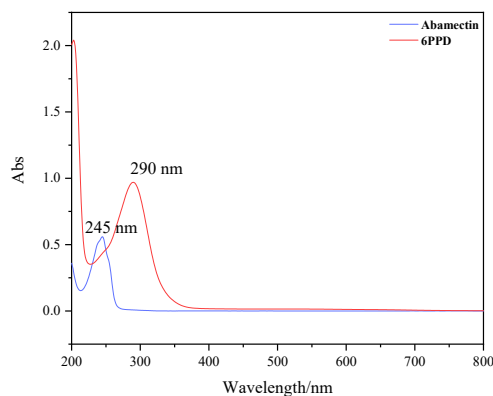

104

Figure S5 The absorption spectra of abamectin and 6PPD in acetonitrile.

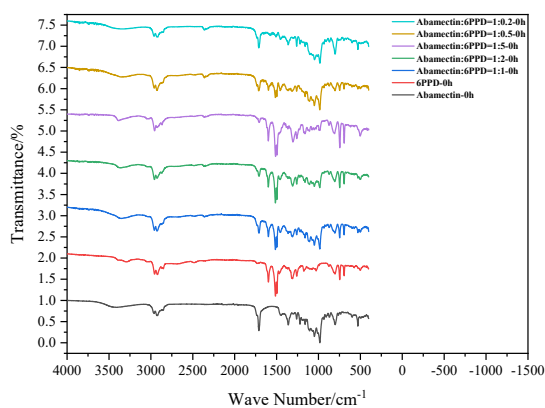

a

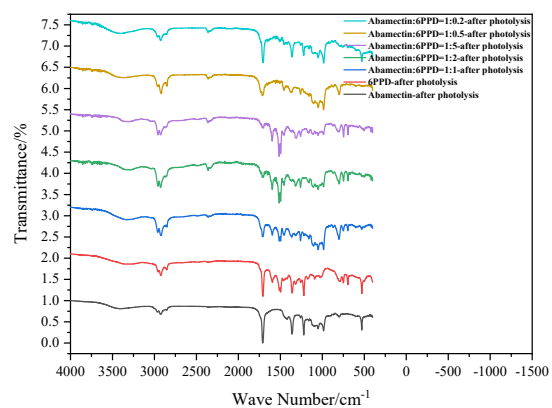

b

Figure S6 The FTIR spectrogram of abamectin, 6PPD, abamectin:6PPD=1:1, abamectin:6PPD=1:2, abamectin:6PPD=1:5, abamectin:6PPD=1:0.5 and abamectin:6PPD=1:0.2 before photolysis (a) and after photolysis (b).

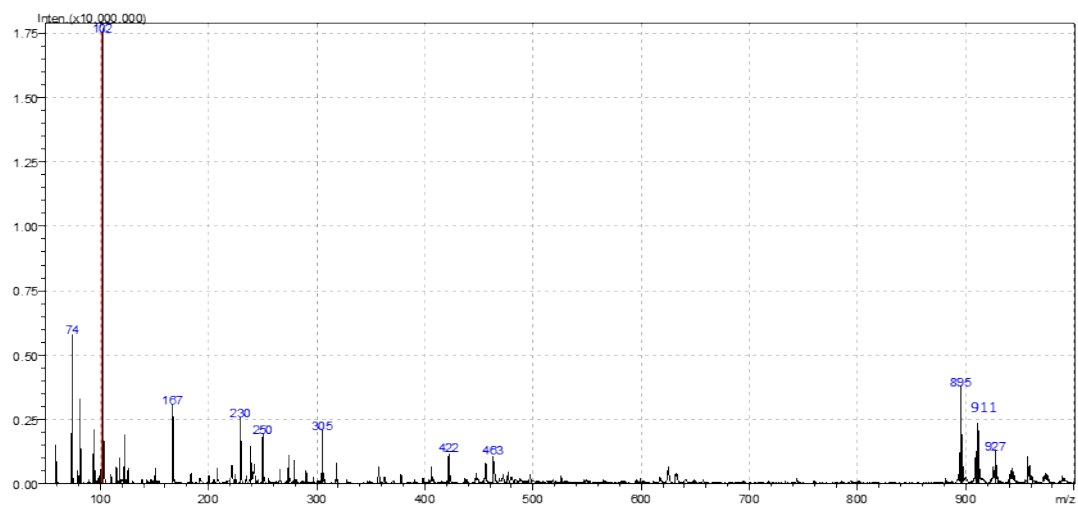

a

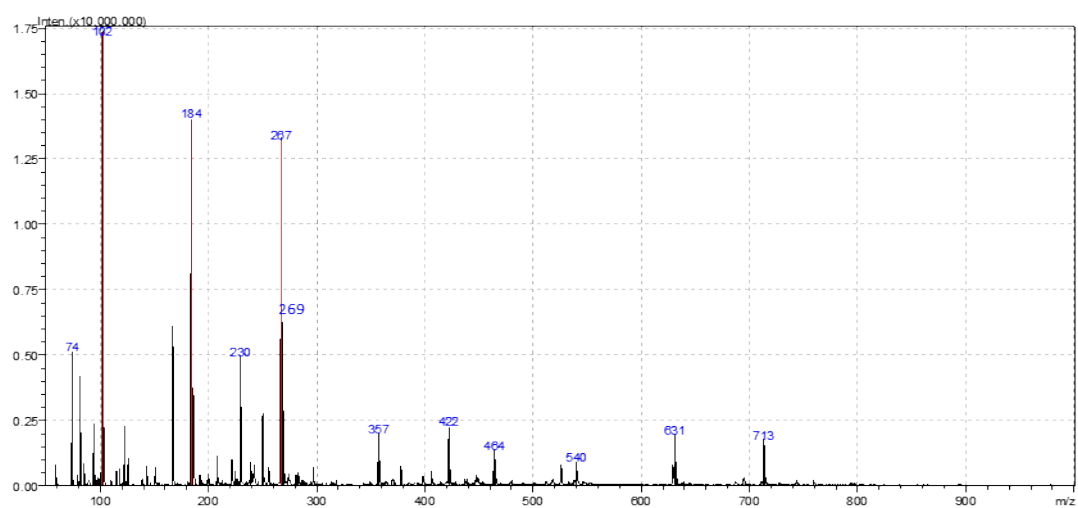

b

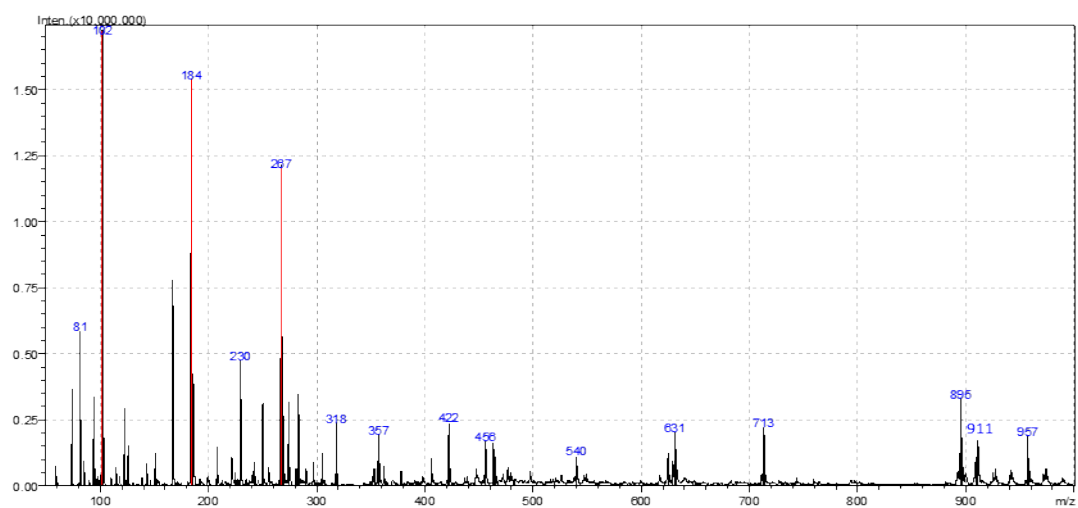

c

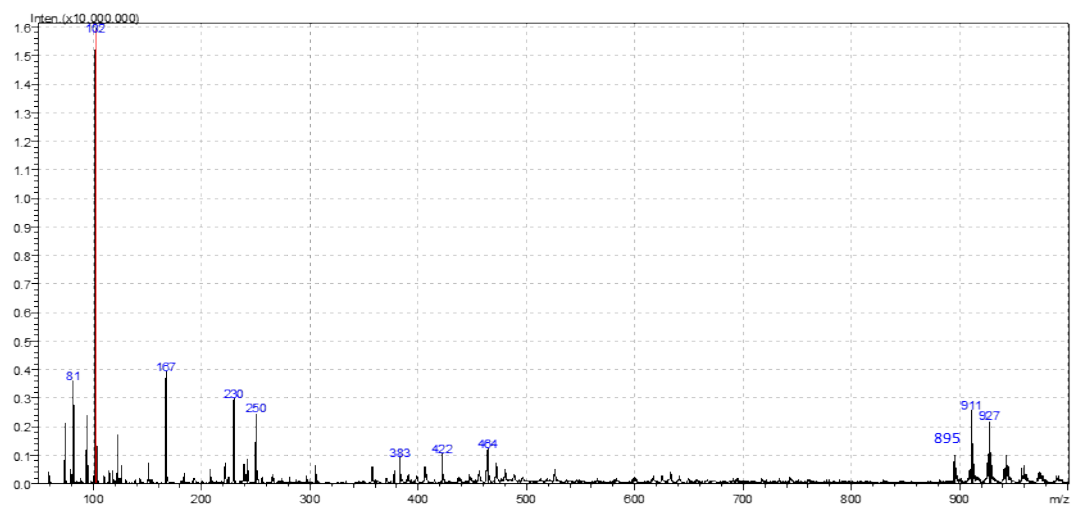

d

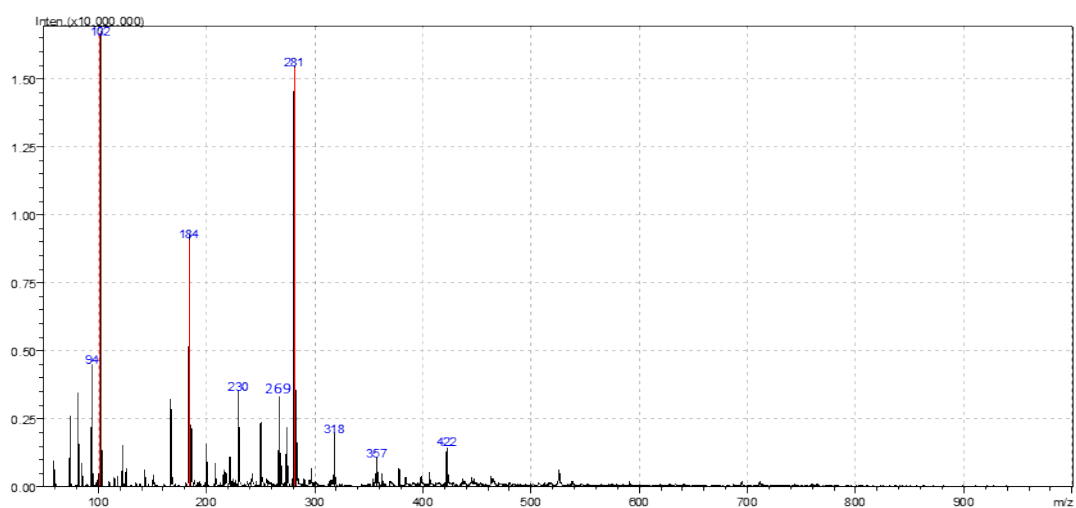

e

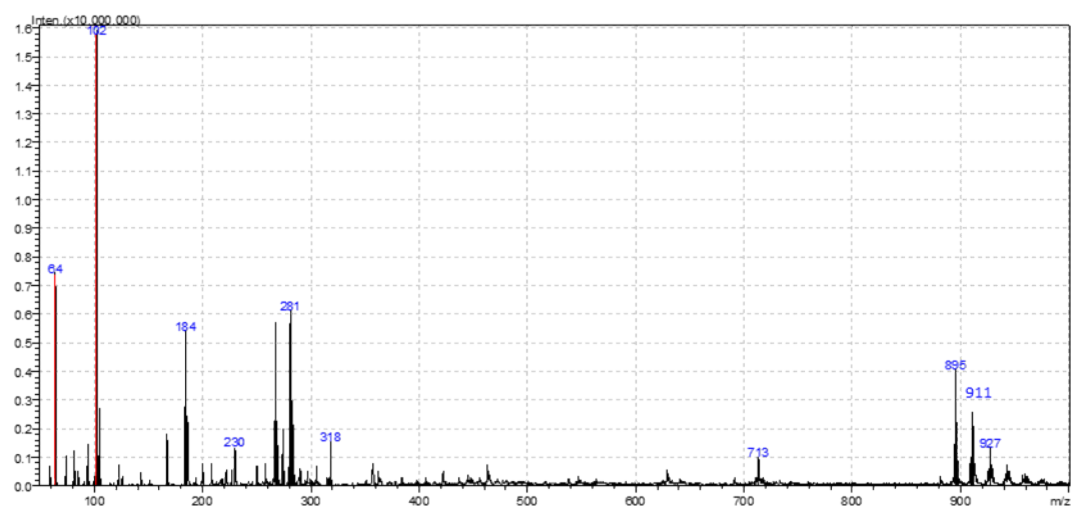

f

Figure S7 The total ion chromatograms of abamectin (a: before photolysis, d: after photolysis), 6PPD (b: before photolysis, e: after photolysis) and abamectin: 6PPD=1:1 (c: before photolysis, f: after photolysis).

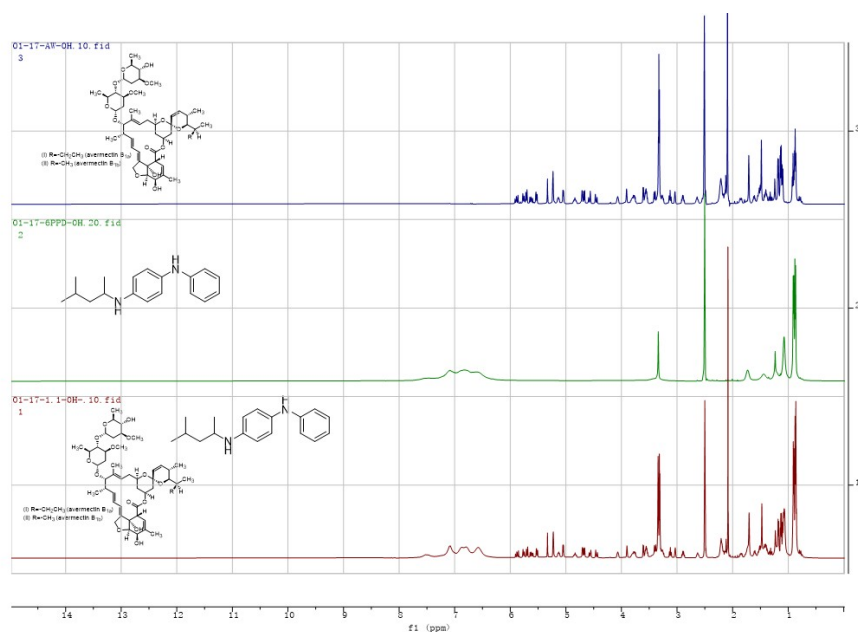

a

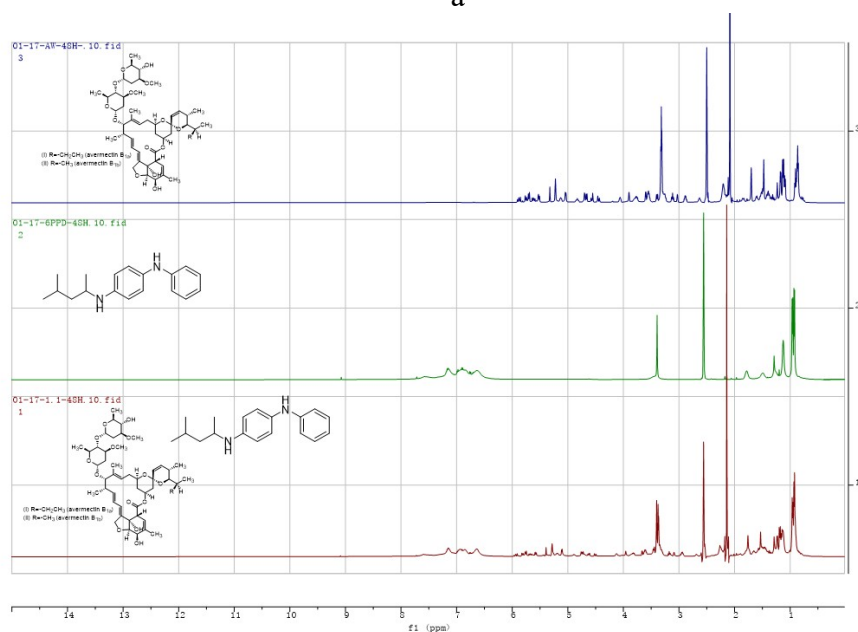

b

112 Figure S8 The <sup>1</sup>H NMR spectra of abamectin, 6PPD and abamectin:6PPD=1:1 before  
113 photolysis (a) and after photolysis (b).
